# Supplementary material for: Efficient Photodynamic Killing of Gram-Positive Bacteria by Synthetic Curcuminoids
Source: PubMed Central journal article supplement (PMC7730963; doi:10.3390/ijms21239024), 2020-11-27
Supplement: ijms-21-09024-s001.pdf [file ijms-21-09024-s001.pdf]

# Efficient Photodynamic Killing of Gram-Positive Bacteria by Synthetic Curcuminoids

Sung-Jen Hung <sup>1,2</sup>, Yi-An Hong <sup>1,3</sup>, Kai-Yu Lin <sup>4</sup>, Yi-Wen Hua <sup>4</sup>, Chia-Jou Kuo <sup>4</sup>, Anren Hu <sup>1,3,\*</sup>, Tzeng-Lien Shih <sup>4,\*</sup> and Hao-Ping Chen <sup>1,5,6,\*</sup>

- <sup>1</sup> Institute of Medical Sciences, Tzu Chi University, Hualien 97004, Taiwan; md.hong@msa.hinet.net (S.-J.H.); amyhung840809@gmail.com (Y.-A.H.)
  - <sup>2</sup> Department of Dermatology, Hualien Tzu Chi Hospital, Hualien 97002, Taiwan
  - <sup>3</sup> Department of Laboratory Medicine and Biotechnology, Tzu Chi University, Hualien 97004, Taiwan
  - <sup>4</sup> Department of Chemistry, Tamkang University, New Taipei City 25137, Taiwan; s930608eagle@gmail.com (K.-Y.L.); a0987719278@gmail.com (Y.-W.H.); b24631839@gmail.com (C.-J.K.)
  - <sup>5</sup> Department of Biochemistry, Tzu Chi University, Hualien 97004, Taiwan
  - <sup>6</sup> Integration Center of Traditional Chinese and Modern Medicine, Hualien Tzu Chi Hospital, Hualien 97002, Taiwan
- \* Correspondence: anren@gms.tcu.edu.tw (A.H.); tlshih@mail.tku.edu.tw (T.-L.S.); hpchen@mail.tcu.edu.tw (H.-P.C.); Tel.: +886-3-856-5301 ext. 2335 (A.H.); +886-2-8631-5024 (T.-L.S.); +886-3-856-5301 ext. 2433 (H.-P.C.)

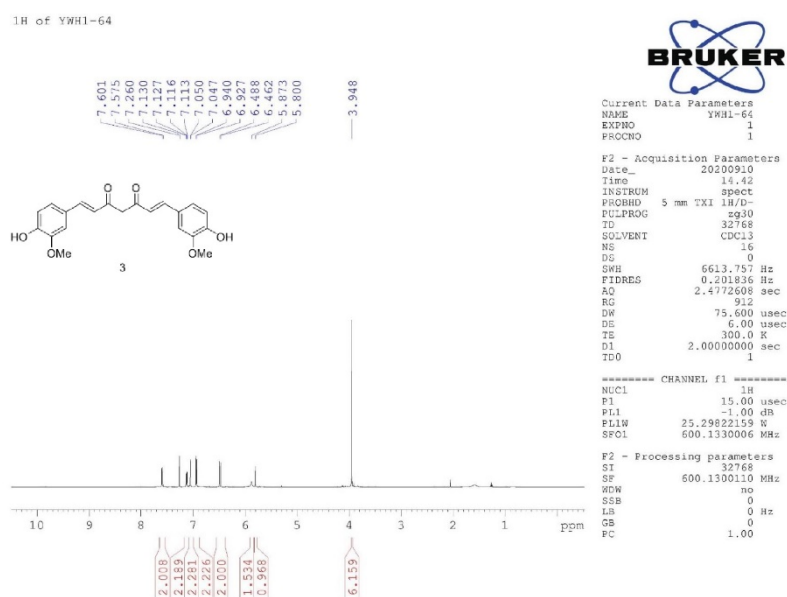

Figure S1. <sup>1</sup>H NMR (600 MHz, CDCl<sub>3</sub>) of compound 3.

<sup>13</sup>C of YWH1-64

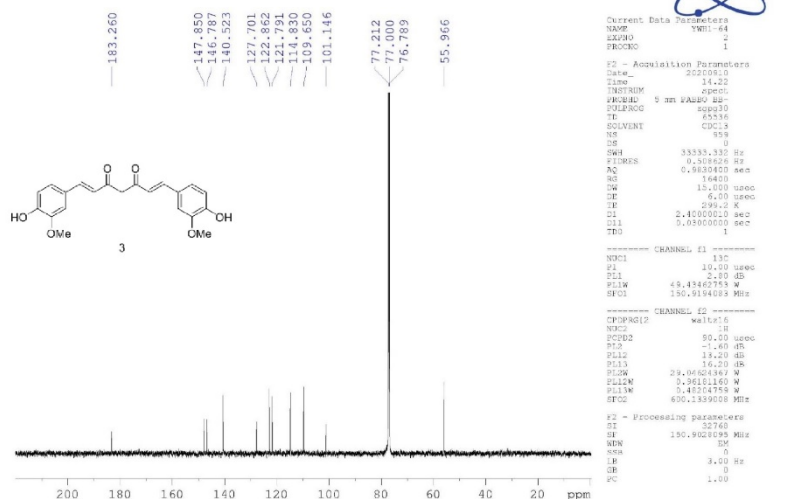

Figure S2. <sup>13</sup>C NMR (150 MHz, CDCl<sub>3</sub>) of compound 3.

<sup>1</sup>H of YWH1-116

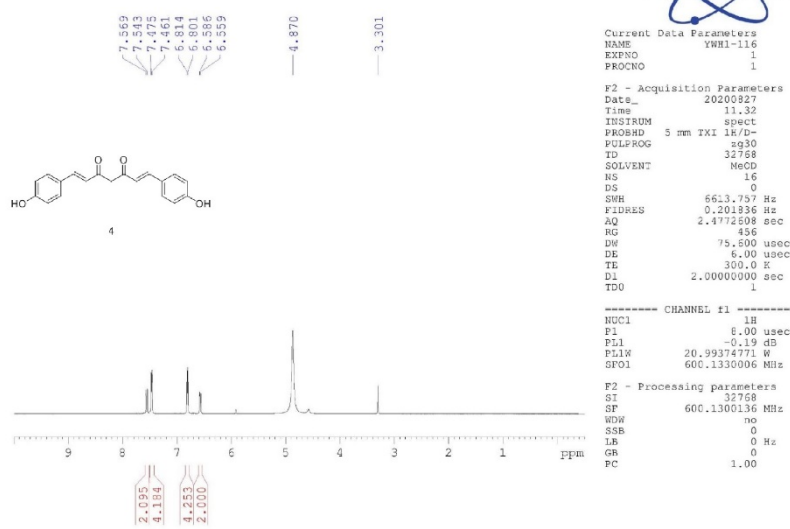

Figure S3. <sup>1</sup>H NMR (600 MHz, CD<sub>3</sub>OD) of compound 4.

<sup>13</sup>C of YWH1-116

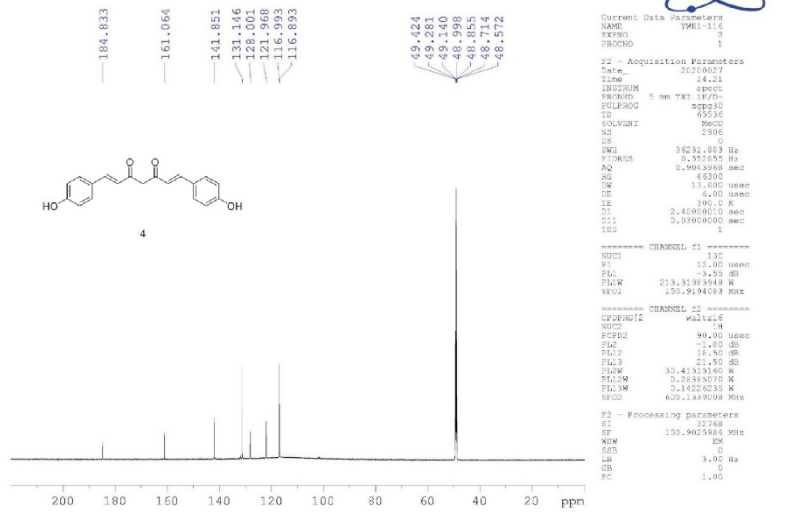

Figure S4. <sup>13</sup>C NMR (150 MHz, CD<sub>3</sub>OD) of compound 4.

<sup>1</sup>H of KYL1-P3

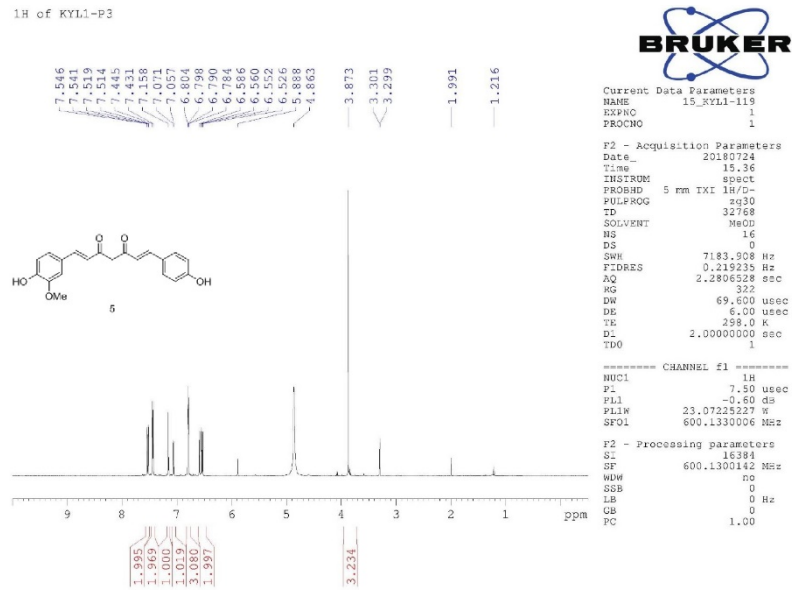

Figure S5. <sup>1</sup>H NMR (600 MHz, CD<sub>3</sub>OD) of compound 5.

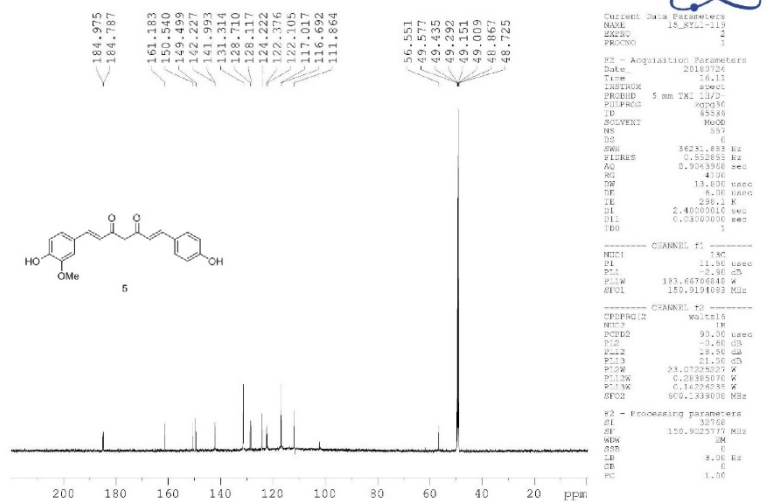Figure S6. <sup>13</sup>C NMR (150 MHz, CD<sub>3</sub>OD) of compound 5.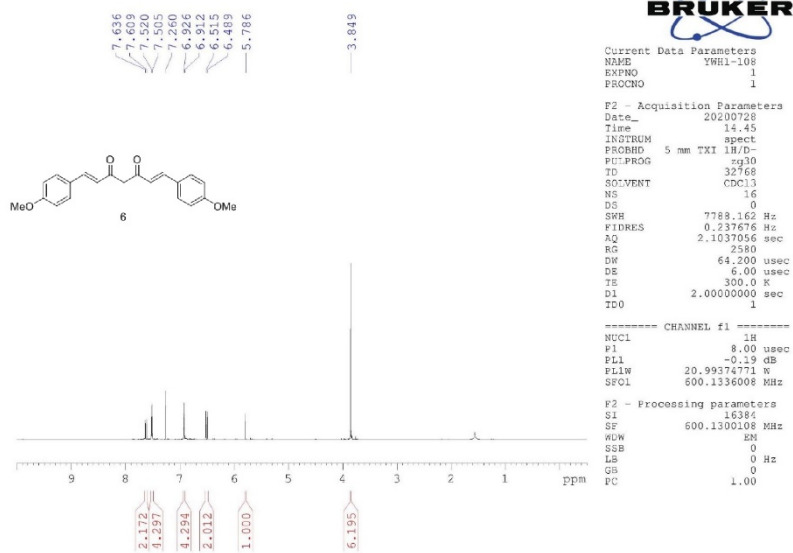Figure S7. <sup>1</sup>H NMR (600 MHz, CDCl<sub>3</sub>) of compound 6.

<sup>13</sup>C of YWH1-108

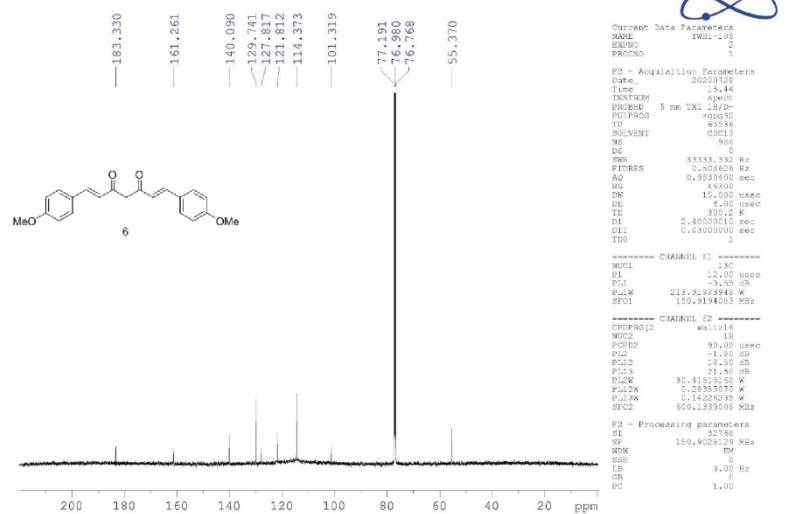

Figure S8. <sup>13</sup>C NMR (150 MHz, CDCl<sub>3</sub>) of compound 6.

<sup>1</sup>H of YWH1-107

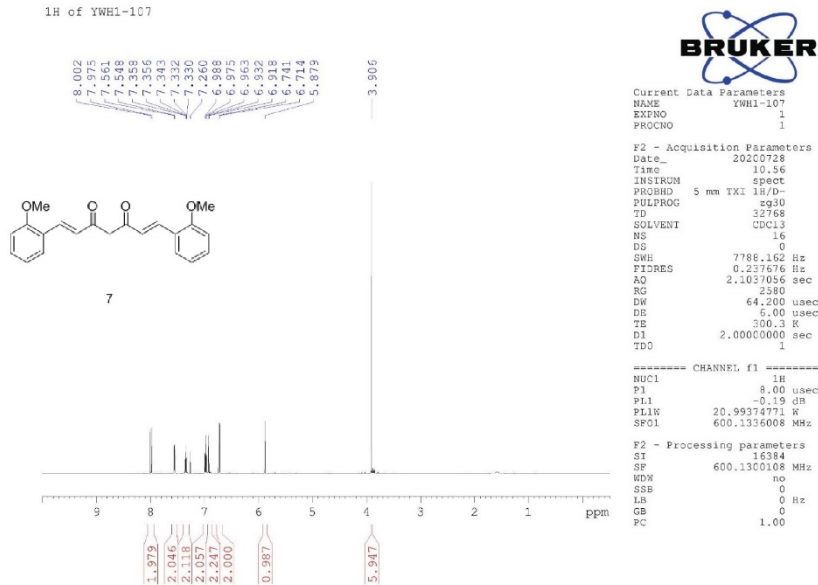

Figure S9. <sup>1</sup>H NMR (600 MHz, CDCl<sub>3</sub>) of compound 7.

13C of YWH1-107

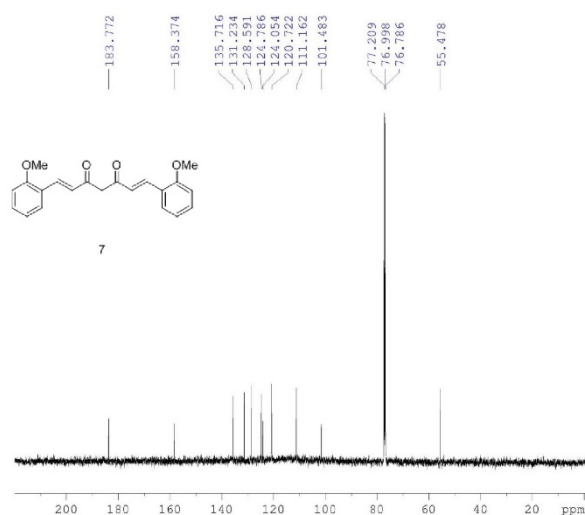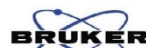

```

Current Data Parameters
NAME      YWH1-107
EXPNO    1
PROCNO   1
----- Acquisition Parameters
Date_    20200728
Time     15:41
INSTRUM  spect
PROBHD   5 mm TXI 1H/1
PULPROG  zgpg30
TE       300.2
SOLVENT  CDCl3
NS       0
DS       0
SWH      33333.332 Hz
FIDRES   0.308625 Hz
AQ       0.5830400 sec
RG       48800
DM       15.000 usec
DE       6.00 usec
TE       300.2 K
D1       2.4500000 sec
D11      0.0300000 sec
TWO      1
----- CHANNEL f1 -----
NUC1     13C
P1       12.00 usec
PL1      -1.50 dB
PL12     15.00 dB
PL13     21.50 dB
PL14     30.4133180 W
PL15     0.23382070 W
PL16     4.14226255 W
SFO1     600.1380000 MHz
----- CHANNEL f2 -----
CPDPRG2  waltz16
NUC2     1H
P2       50.00 usec
PL2      -1.80 dB
PL22     15.00 dB
PL23     21.50 dB
PL24     30.4133180 W
PL25     0.23382070 W
PL26     4.14226255 W
SFO2     600.1380000 MHz
----- Processing parameters -----
SI       32768
SF       150.908129 MHz
WDW      EM
SSB      0
LB       3.00 Hz
GB       0
PC       1.00
  
```

Figure S10. <sup>13</sup>C NMR (150 MHz, CDCl<sub>3</sub>) of compound 7.

1H of CJK1-106

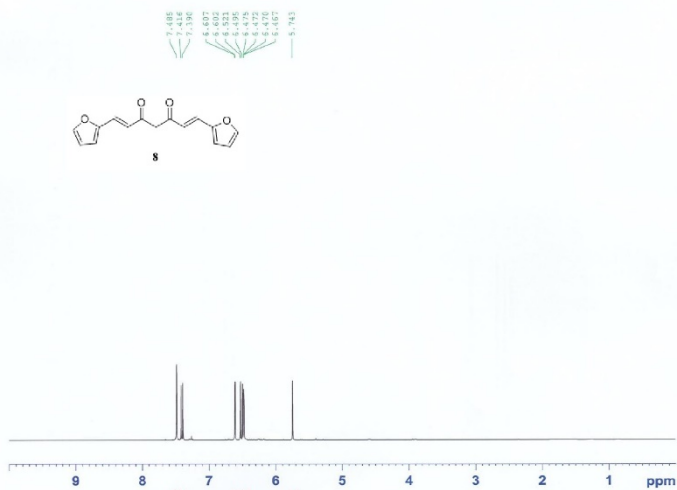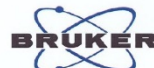

```

NAME      CJK1-106
EXPNO    1
PROCNO   1
Date_    20200914
Time     15:58
INSTRUM  spect
PROBHD   5 mm TXI 1H/D-
PULPROG  zg30
TE       32768
SOLVENT  CDCl3
NS       0
DS       0
SWH      6513.757 Hz
FIDRES   0.201836 Hz
AQ       2.4773865 sec
RG       256
DM       75.600 usec
DE       6.00 usec
TE       300.2 K
D1       2.0000000 sec
TWO      1
----- CHANNEL f1 -----
NUC1     1H
P1       8.00 usec
PL1      -0.15 dB
PL12     20.99374771 W
SFO1     600.1380000 MHz
SI       16384
SF       600.1380000 MHz
WDW      EM
SSB      0
LB       0.00 Hz
GB       0
PC       1.00
  
```

Figure S11. <sup>1</sup>H NMR (600 MHz, CDCl<sub>3</sub>) of compound 8.

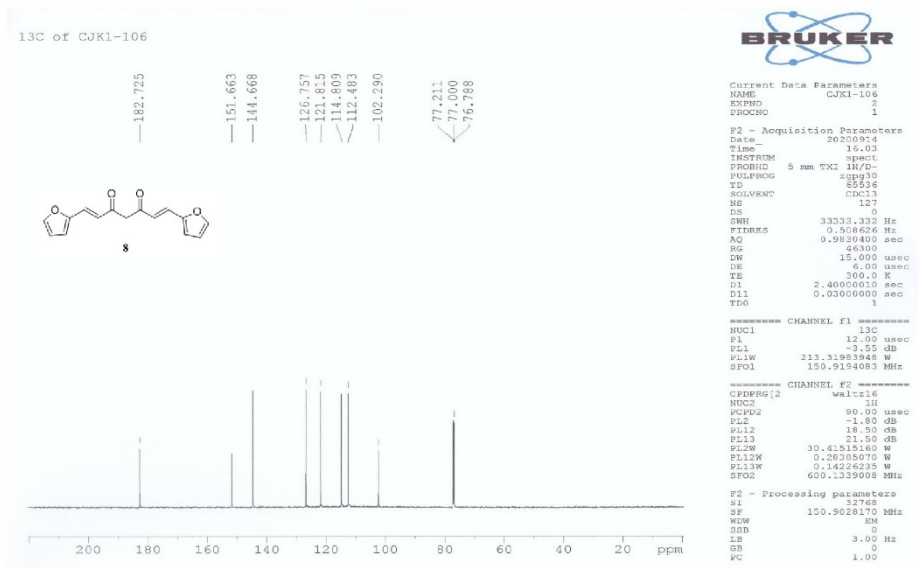

Figure S12. <sup>13</sup>C NMR (150 MHz, CDCl<sub>3</sub>) of compound 8.

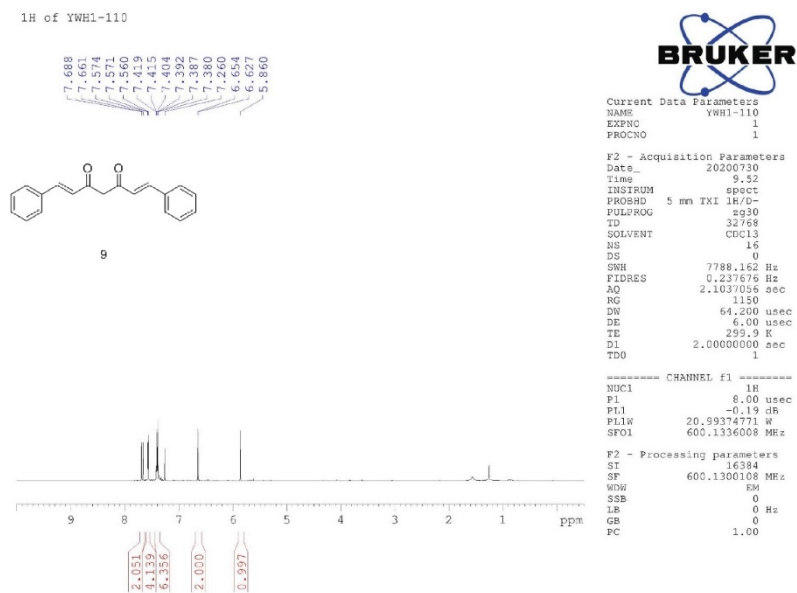

Figure S13. <sup>1</sup>H NMR (600 MHz, CDCl<sub>3</sub>) of compound 9.

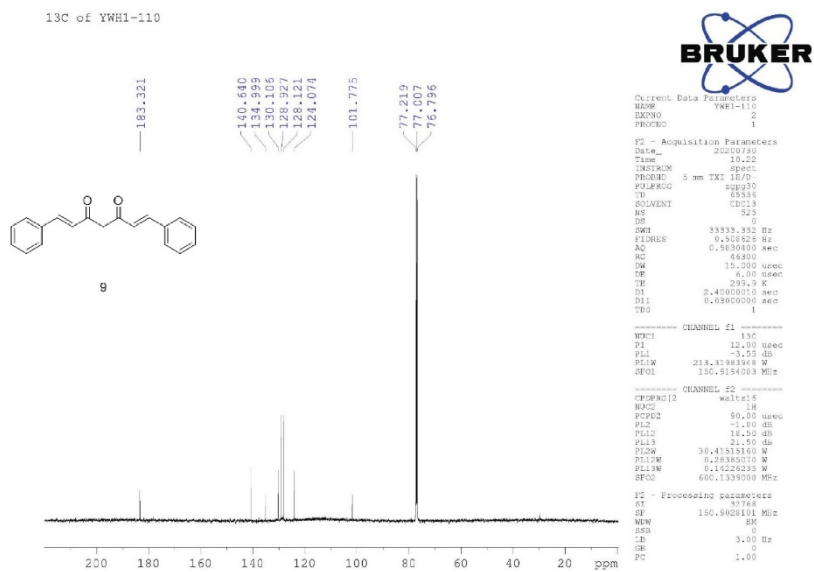

Figure S14. <sup>13</sup>C NMR (150 MHz, CDCl<sub>3</sub>) of compound 9.

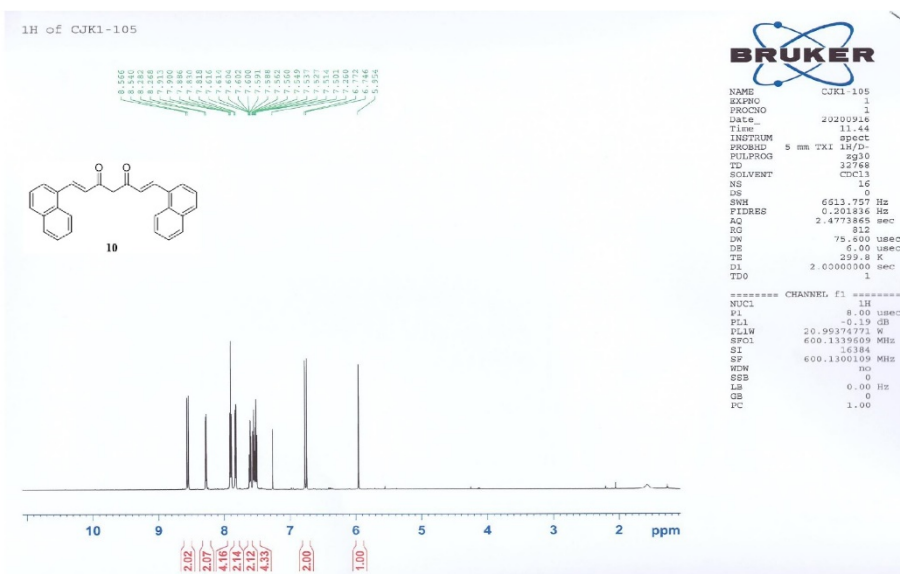

Figure S15. <sup>1</sup>H NMR (600 MHz, CDCl<sub>3</sub>) of compound 10.

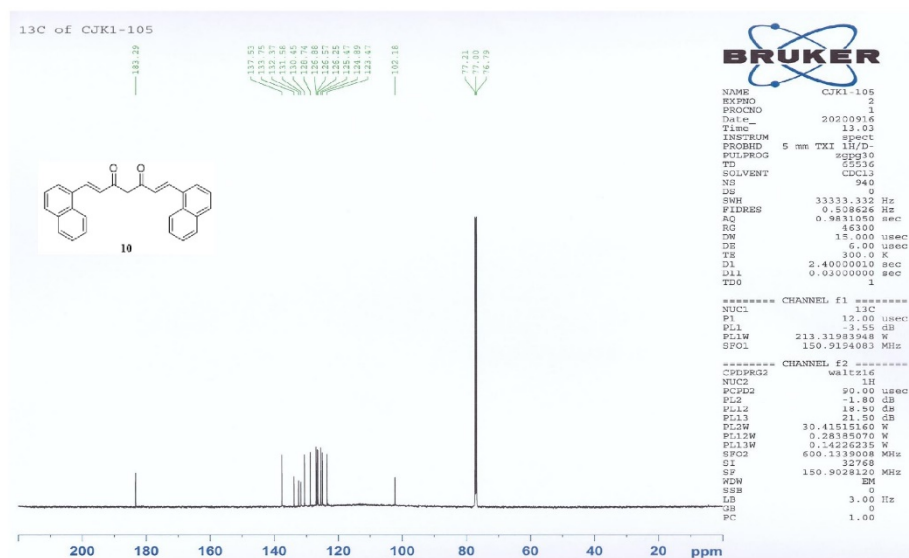

Figure S16. <sup>13</sup>C NMR (150 MHz, CDCl<sub>3</sub>) of compound 10.



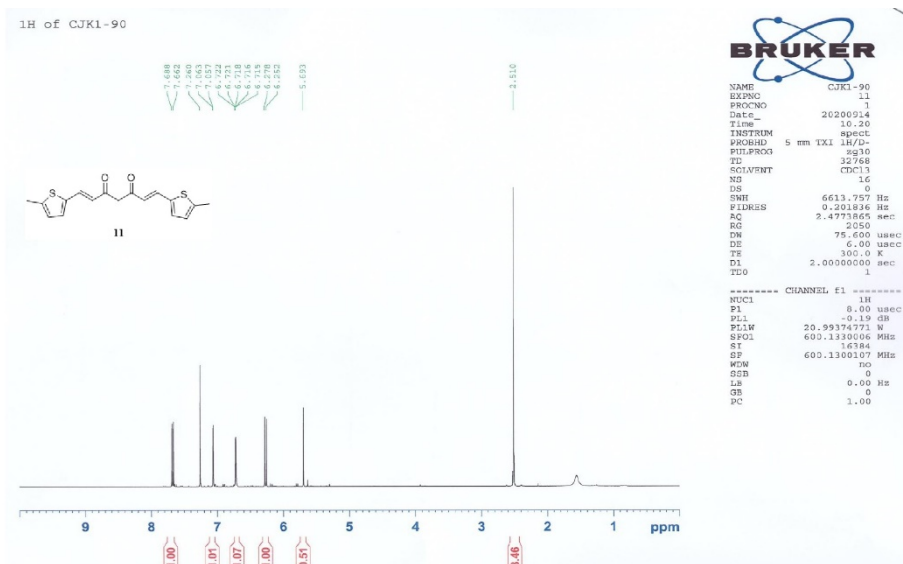

Figure S17. <sup>1</sup>H NMR (600 MHz, CDCl<sub>3</sub>) of compound 11.

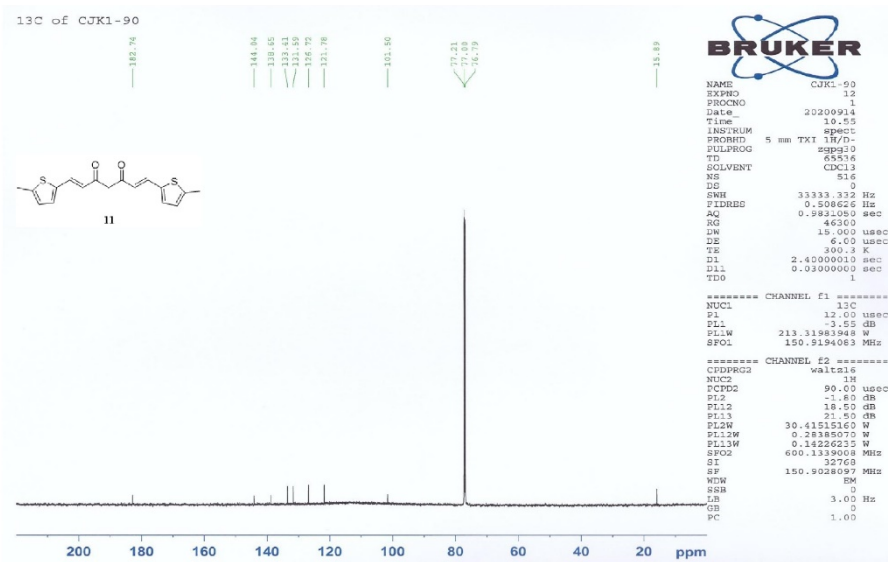

Figure S18. <sup>13</sup>C NMR (150 MHz, CDCl<sub>3</sub>) of compound 11.

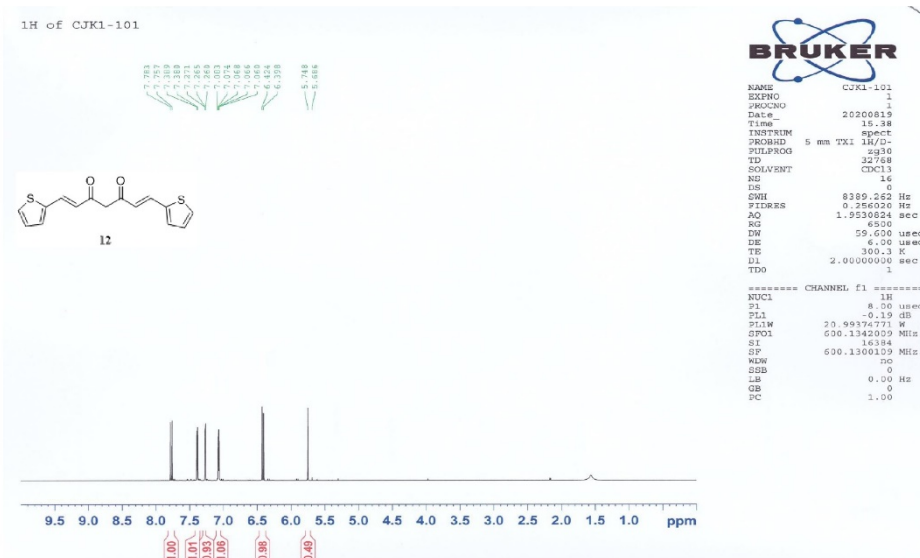

Figure S19. <sup>1</sup>H NMR (600 MHz, CDCl<sub>3</sub>) of compound 12.

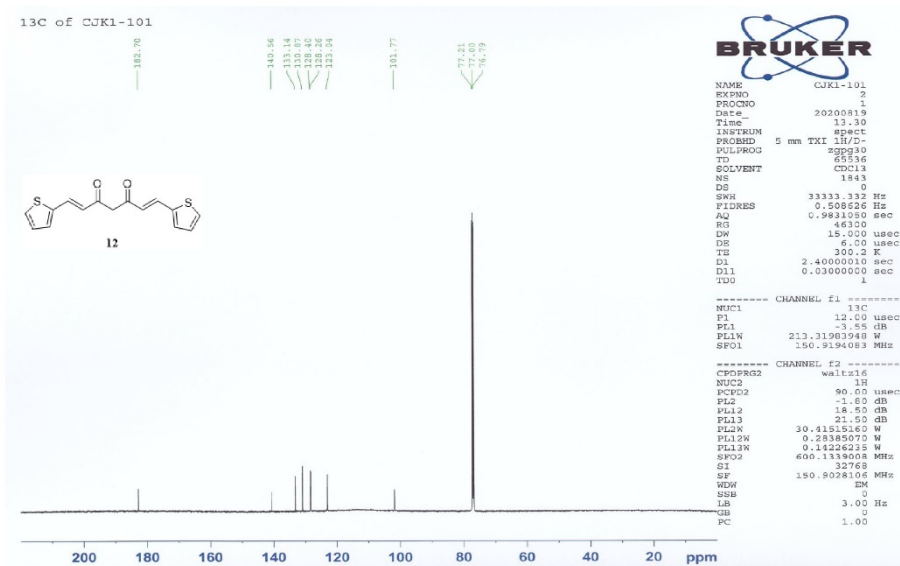

Figure S20. <sup>13</sup>C NMR (150 MHz, CDCl<sub>3</sub>) of compound 12.

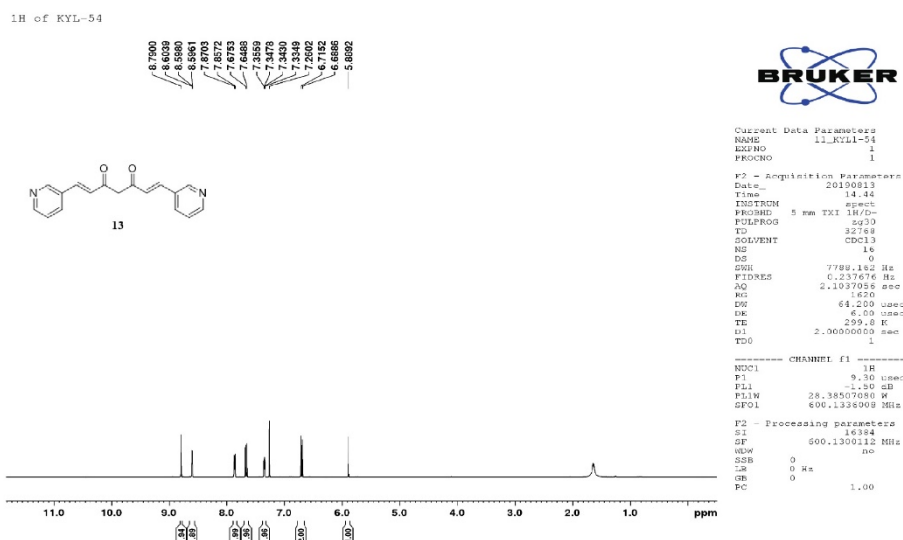

Figure S21. <sup>1</sup>H NMR (600 MHz, CDCl<sub>3</sub>) of compound 13.

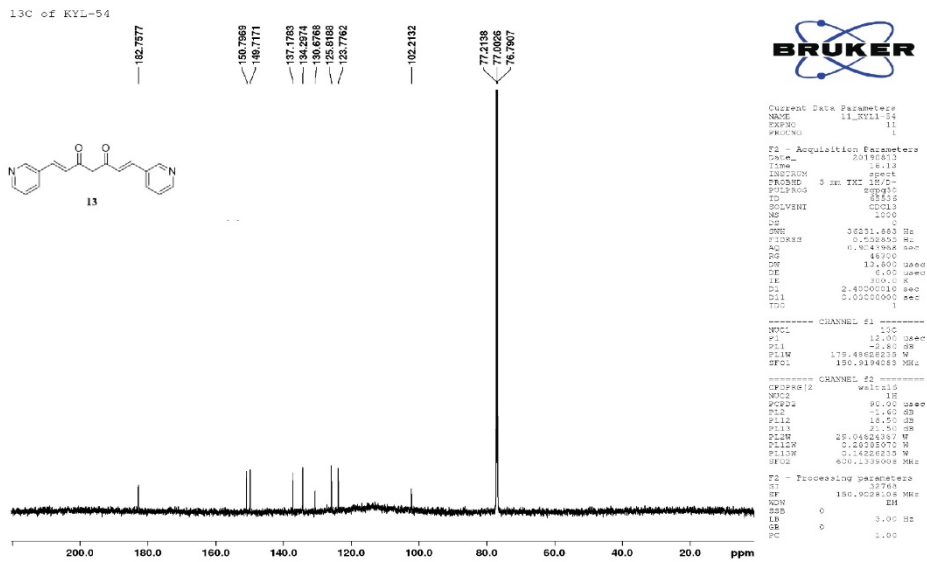

Figure S22. <sup>13</sup>C NMR (150 MHz, CDCl<sub>3</sub>) of compound 13.

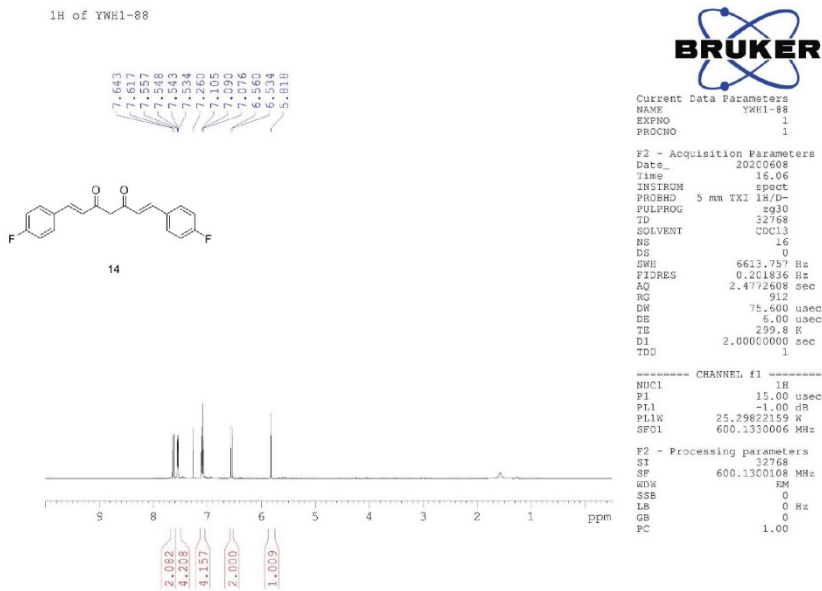

Figure S23. <sup>1</sup>H NMR (150 MHz, CDCl<sub>3</sub>) of compound 14.

13C of YWH1-88

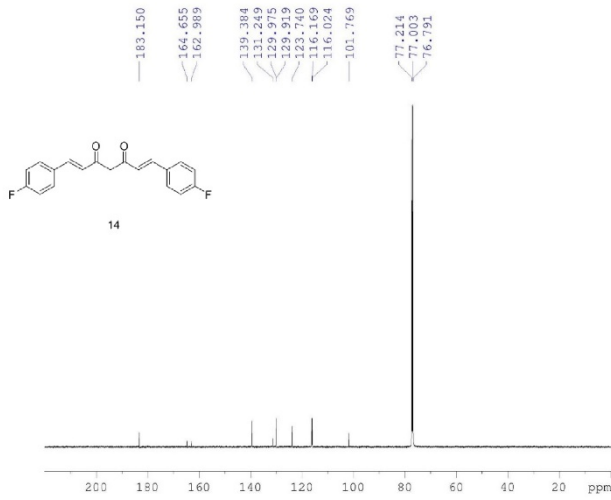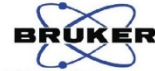

Current Data Parameters  
NAME YWH1-88  
EXPNO 1  
PROCNO 1

F2 - Acquisition Parameters  
Date\_ 20200901  
Time 14.50  
INSTRUM spect  
PROBHD 5 mm 1A5BQ us-  
PULPROG zgpg30  
TD 65536  
SOLVENT CDCl3  
NS 1813  
DS 4  
SWH 33333.333 Hz  
FIDRES 0.328625 Hz  
AQ 0.8828123 sec  
RG 44300  
WM 15.000 usec  
DE 4.00 usec  
TE 296.2 K  
D1 2.4000000 sec  
D11 0.0300000 sec  
TDD

CHANNEL #1  
NUC1 13C  
P1 10.00 usec  
PL1 2.00 dB  
PL1W 45.4846375 W  
SFO1 100.628125 MHz

CHANNEL #2  
CPDPRG2 waltz16  
NUC1 1H  
PCPD 90.00 usec  
PL2 -1.00 dB  
PL12 13.20 dB  
PL13 14.20 dB  
PL14 14.20 dB  
PL15 14.20 dB  
PL16 14.20 dB  
PL17 14.20 dB  
PL18 14.20 dB  
PL19 14.20 dB  
PL20 14.20 dB  
PL21 14.20 dB  
PL22 14.20 dB  
PL23 14.20 dB  
PL24 14.20 dB  
PL25 14.20 dB  
PL26 14.20 dB  
PL27 14.20 dB  
PL28 14.20 dB  
PL29 14.20 dB  
PL30 14.20 dB  
PL31 14.20 dB  
PL32 14.20 dB  
PL33 14.20 dB  
PL34 14.20 dB  
PL35 14.20 dB  
PL36 14.20 dB  
PL37 14.20 dB  
PL38 14.20 dB  
PL39 14.20 dB  
PL40 14.20 dB  
PL41 14.20 dB  
PL42 14.20 dB  
PL43 14.20 dB  
PL44 14.20 dB  
PL45 14.20 dB  
PL46 14.20 dB  
PL47 14.20 dB  
PL48 14.20 dB  
PL49 14.20 dB  
PL50 14.20 dB  
PL51 14.20 dB  
PL52 14.20 dB  
PL53 14.20 dB  
PL54 14.20 dB  
PL55 14.20 dB  
PL56 14.20 dB  
PL57 14.20 dB  
PL58 14.20 dB  
PL59 14.20 dB  
PL60 14.20 dB  
PL61 14.20 dB  
PL62 14.20 dB  
PL63 14.20 dB  
PL64 14.20 dB  
PL65 14.20 dB  
PL66 14.20 dB  
PL67 14.20 dB  
PL68 14.20 dB  
PL69 14.20 dB  
PL70 14.20 dB  
PL71 14.20 dB  
PL72 14.20 dB  
PL73 14.20 dB  
PL74 14.20 dB  
PL75 14.20 dB  
PL76 14.20 dB  
PL77 14.20 dB  
PL78 14.20 dB  
PL79 14.20 dB  
PL80 14.20 dB  
PL81 14.20 dB  
PL82 14.20 dB  
PL83 14.20 dB  
PL84 14.20 dB  
PL85 14.20 dB  
PL86 14.20 dB  
PL87 14.20 dB  
PL88 14.20 dB  
PL89 14.20 dB  
PL90 14.20 dB  
PL91 14.20 dB  
PL92 14.20 dB  
PL93 14.20 dB  
PL94 14.20 dB  
PL95 14.20 dB  
PL96 14.20 dB  
PL97 14.20 dB  
PL98 14.20 dB  
PL99 14.20 dB  
PL100 14.20 dB

F2 - Processing parameters  
SI 32768  
SF 600.1330000 MHz  
WDW no  
SSB 0  
LB 0 Hz  
GB 0  
PC 1.00

Figure S24. <sup>13</sup>C NMR (150 MHz, CDCl<sub>3</sub>) of compound 14.

1H of YWH1-121

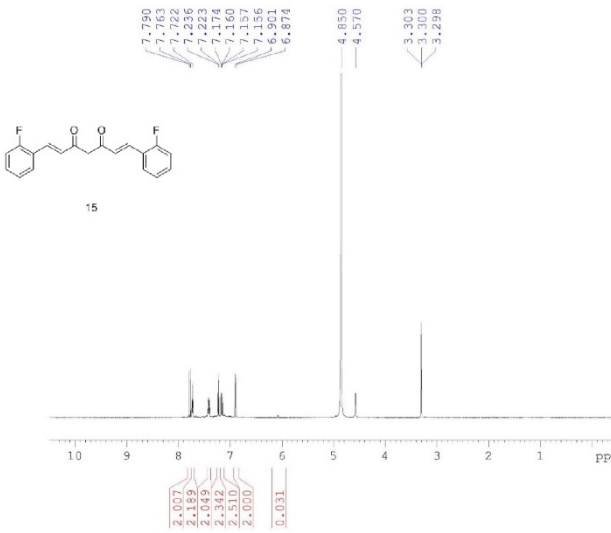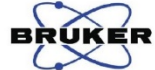

Current Data Parameters  
NAME YWH1-121  
EXPNO 1  
PROCNO 1

F2 - Acquisition Parameters  
Date\_ 20200827  
Time 10.51  
INSTRUM spect  
PROBHD 5 mm TXI 1H/1D-  
PULPROG zg30  
TD 32768  
SOLVENT MeOD  
NS 16  
DS 0  
SWH 6613.757 Hz  
FIDRES 0.201836 Hz  
AQ 2.4772608 sec  
RG 724  
WM 75.600 usec  
DE 6.00 usec  
TE 300.0 K  
D1 2.0000000 sec  
D11 0.0300000 sec  
TDD 1

CHANNEL #1  
NUC1 1H  
P1 8.00 usec  
PL1 -0.19 dB  
PL1W 20.9937472 W  
SFO1 600.1330006 MHz

F2 - Processing parameters  
SI 32768  
SF 600.1330136 MHz  
WDW no  
SSB 0  
LB 0 Hz  
GB 0  
PC 1.00

Figure S25. <sup>1</sup>H NMR (600 MHz, CD<sub>3</sub>OD) of compound 15.

<sup>13</sup>C of YWH1-121

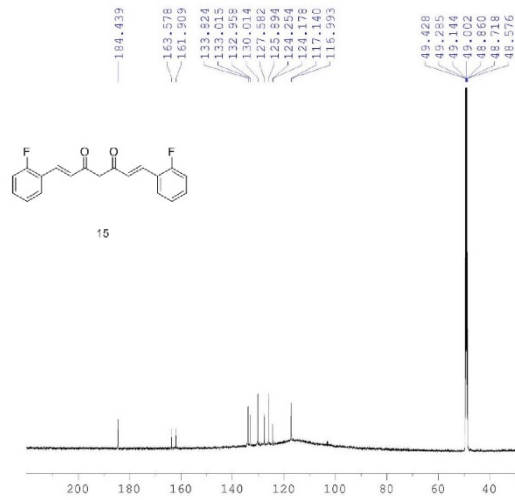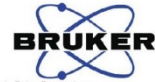

Current Data Parameters  
NAME YWH1-121  
PROCNO 1  
Date 20200927  
Time 14.17  
INSTRUM spect  
PROBHD 5 mm TXI 1H/13  
PULPROG zgpg30  
TD 65536  
SOLVENT CDCl3  
NS 1  
DS 0  
SWH 36231.803 Hz  
FIDRES 0.251858 Hz  
AQ 0.9043968 sec  
RG 3200  
DW 13.800 usec  
DE 6.00 usec  
TE 300.2 K  
D1 2.4000010 sec  
D11 0.0500000 sec  
TDO 1

===== CHANNEL f1 =====  
NUCL 13C  
P1 12.00 usec  
PL1 -4.55 dB  
PL12 18.40 dB  
PL13 21.50 dB  
PLW 30.4215160 W  
PL13W 0.34226235 W  
SFO1 100.6281500 MHz  
SFO2 600.1339000 MHz  
SI 32768  
SF 150.9028114 MHz  
WDW EM  
SSB 0  
LB 3.00 Hz  
GB 0  
PC 1.00

Figure S26. <sup>13</sup>C NMR (150 MHz, CD<sub>3</sub>OD) of compound 15.

<sup>1</sup>H of CJK1-102

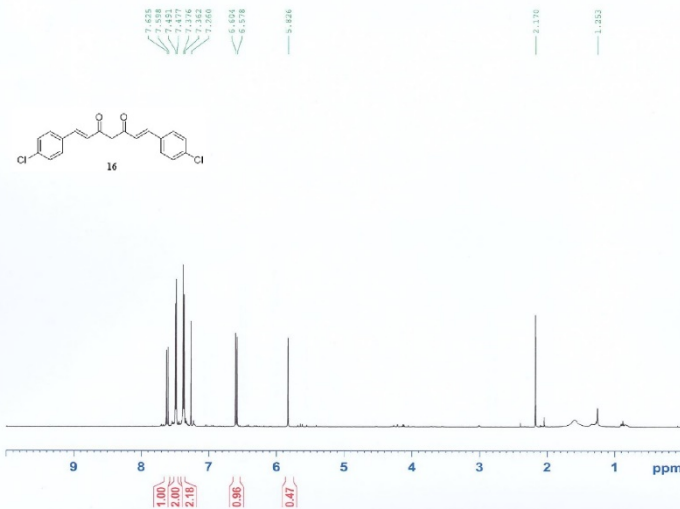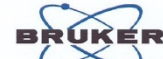

NAME CJK1-102  
EXPNO 12  
PROCNO 1  
Date 20200902  
Time 14.16  
INSTRUM spect  
PROBHD 5 mm TXI 1H/13  
PULPROG zgpg30  
TD 33744  
SOLVENT CDCl3  
NS 16  
DS 0  
SWH 8389.362 Hz  
FIDRES 0.256020 Hz  
AQ 1.9530824 sec  
RG 4100  
DW 59.600 usec  
DE 6.00 usec  
TE 300.0 K  
D1 2.0000000 sec  
TDO 1

===== CHANNEL f1 =====  
NUCL 1H  
P1 8.00 usec  
PL1 0.19 dB  
SFO1 200.9937771 MHz  
SFO2 600.1342009 MHz  
SI 16384  
SF 600.1301005 MHz  
WDW no  
SSB 0  
LB 0.00 Hz  
GB 0  
PC 1.00

Figure S27. <sup>1</sup>H NMR (600 MHz, CDCl<sub>3</sub>) of compound 16.

<sup>13</sup>C of CJK1-102

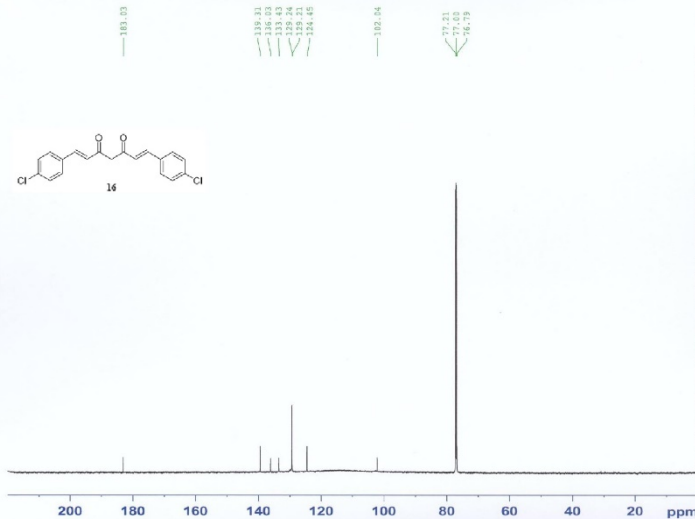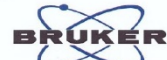

NAME CJK1-102  
EXPNO 12  
PROCNO 1  
Date 20200902  
Time 16.13  
INSTRUM spect  
PROBHD 5 mm TXI 1H/13  
PULPROG zgpg30  
TD 65536  
SOLVENT CDCl3  
NS 1362  
DS 0  
SWH 33331.332 Hz  
FIDRES 0.504626 Hz  
AQ 0.9831050 sec  
RG 46300  
DW 15.000 usec  
DE 6.00 usec  
TE 300.0 K  
D1 2.4000010 sec  
D11 0.0500000 sec  
TDO 1

===== CHANNEL f1 =====  
NUCL 13C  
P1 12.00 usec  
PL1 -4.55 dB  
PL12 18.40 dB  
PL13 21.50 dB  
PLW 30.4215160 W  
PL13W 0.26185070 W  
SFO1 100.6281500 MHz  
SFO2 600.1339000 MHz  
SI 32768  
SF 150.9028114 MHz  
WDW EM  
SSB 0  
LB 3.00 Hz  
GB 0  
PC 1.00

Figure S28. <sup>13</sup>C NMR (150 MHz, CDCl<sub>3</sub>) of compound 16.

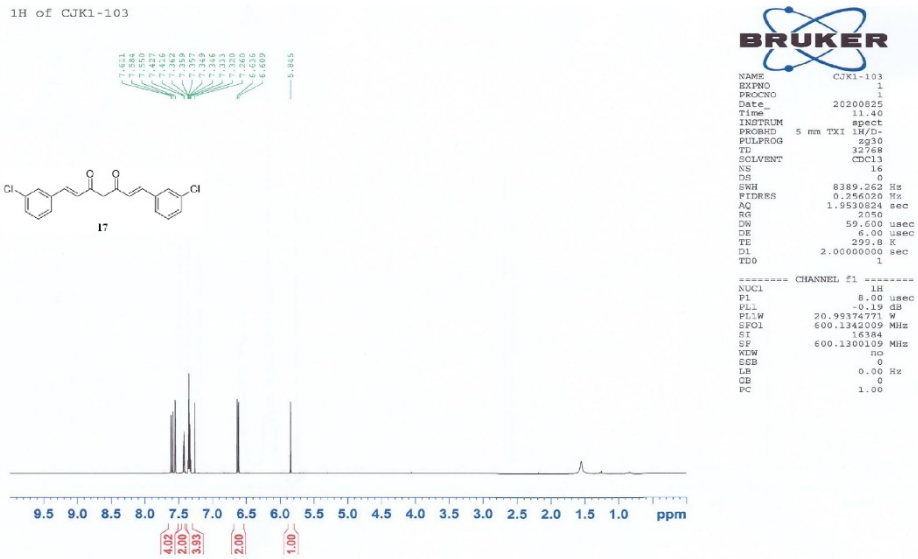

Figure S29. <sup>1</sup>H NMR (600 MHz, CDCl<sub>3</sub>) of compound 17.

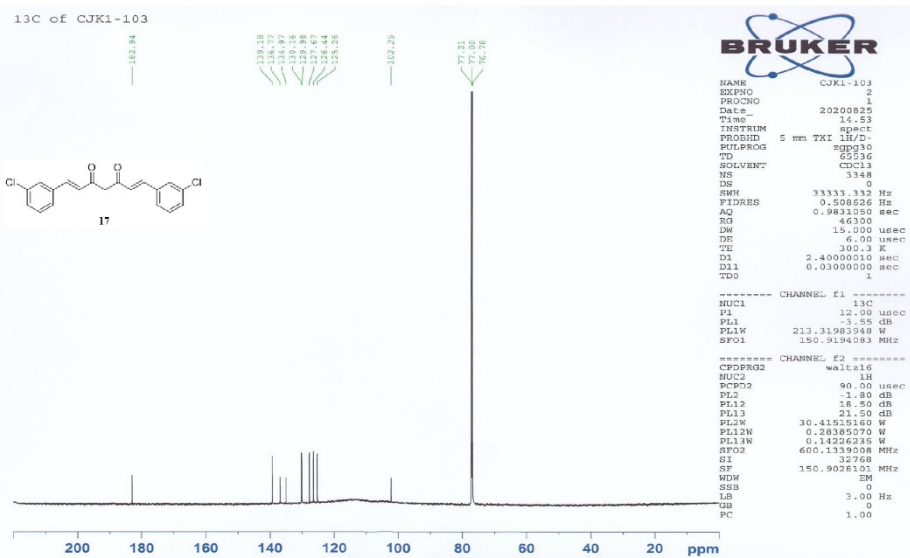

Figure S30. <sup>13</sup>C NMR (150 MHz, CDCl<sub>3</sub>) of compound 17.

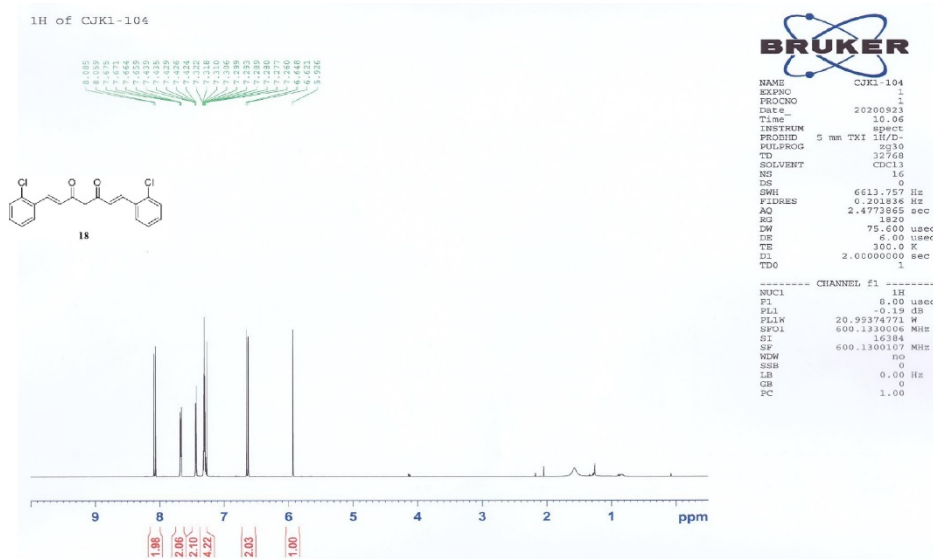

Figure S31. <sup>1</sup>H NMR (600 MHz, CDCl<sub>3</sub>) of compound 18.

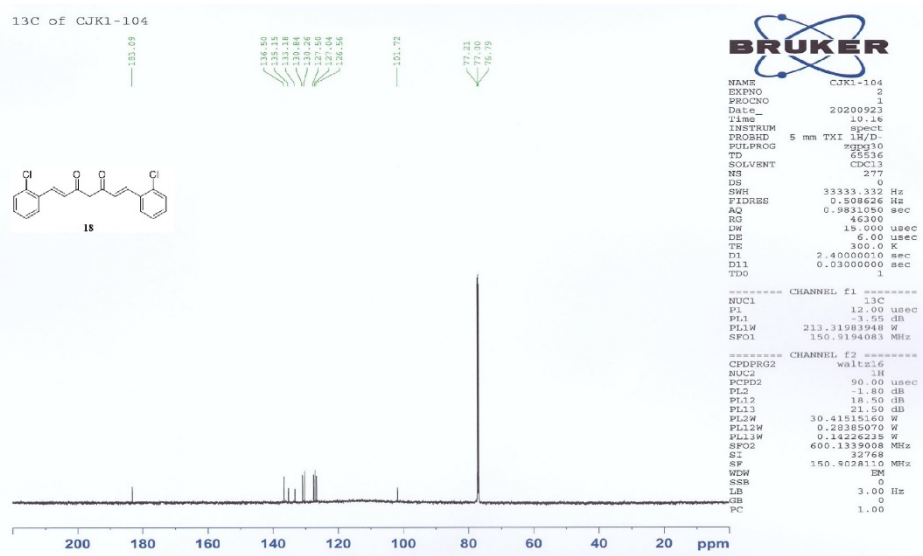

Figure S32. <sup>13</sup>C NMR (150 MHz, CDCl<sub>3</sub>) of compound 18.

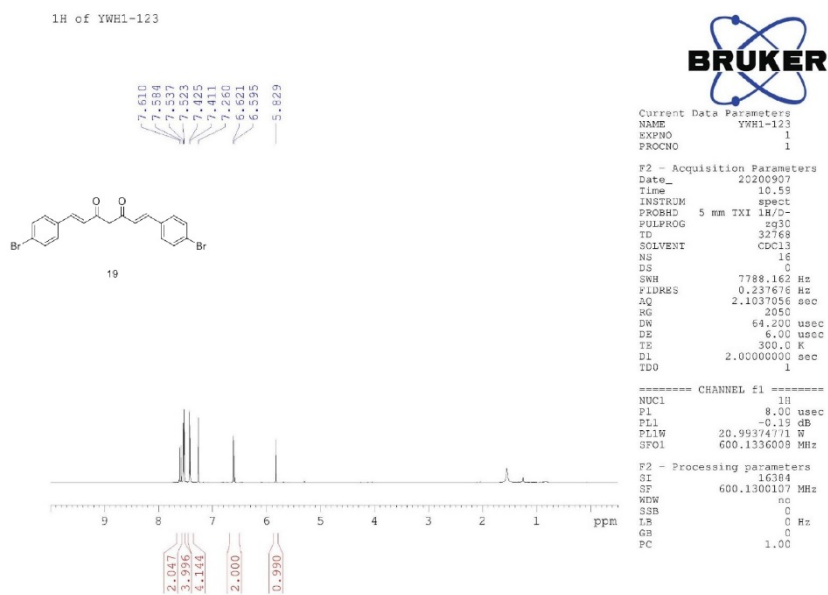

Figure S33. <sup>1</sup>H NMR (600 MHz, CDCl<sub>3</sub>) of compound 19.

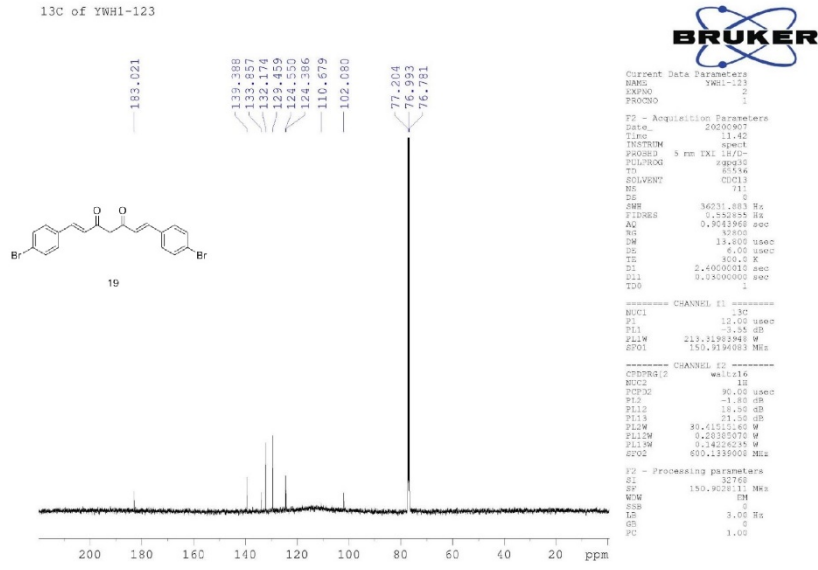

Figure S34. <sup>13</sup>C NMR (150 MHz, CDCl<sub>3</sub>) of compound 19.

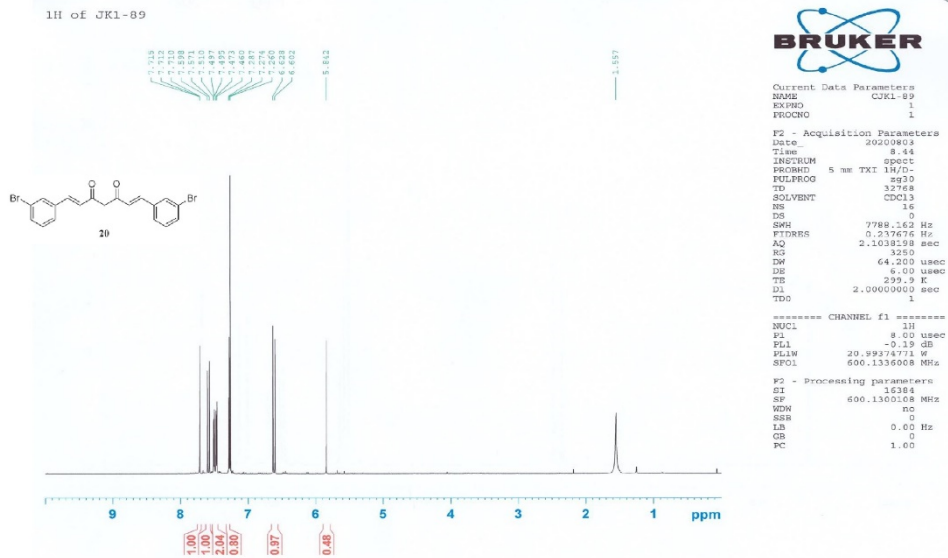

Figure S35. <sup>1</sup>H NMR (600 MHz, CDCl<sub>3</sub>) of compound 20.



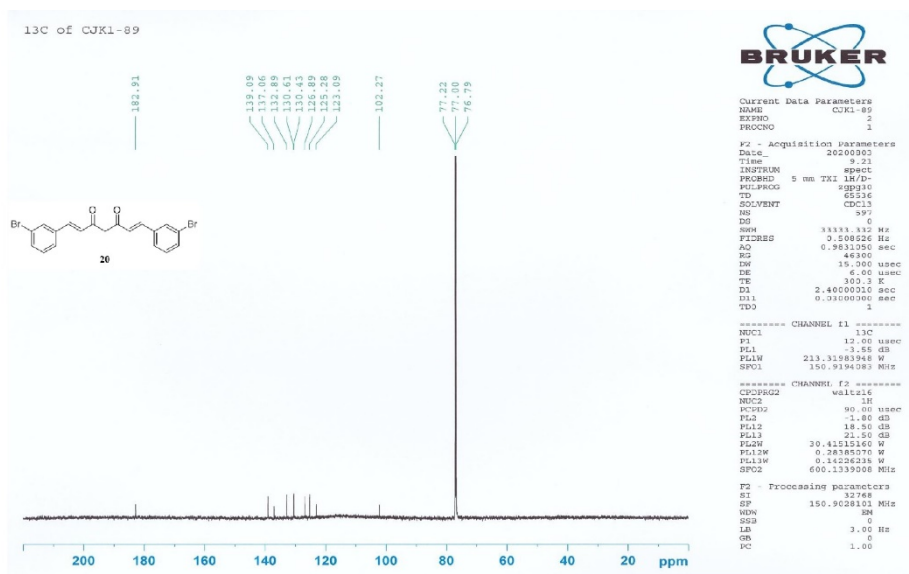

Figure S36. <sup>13</sup>C NMR (150 MHz, CDCl<sub>3</sub>) of compound 20.

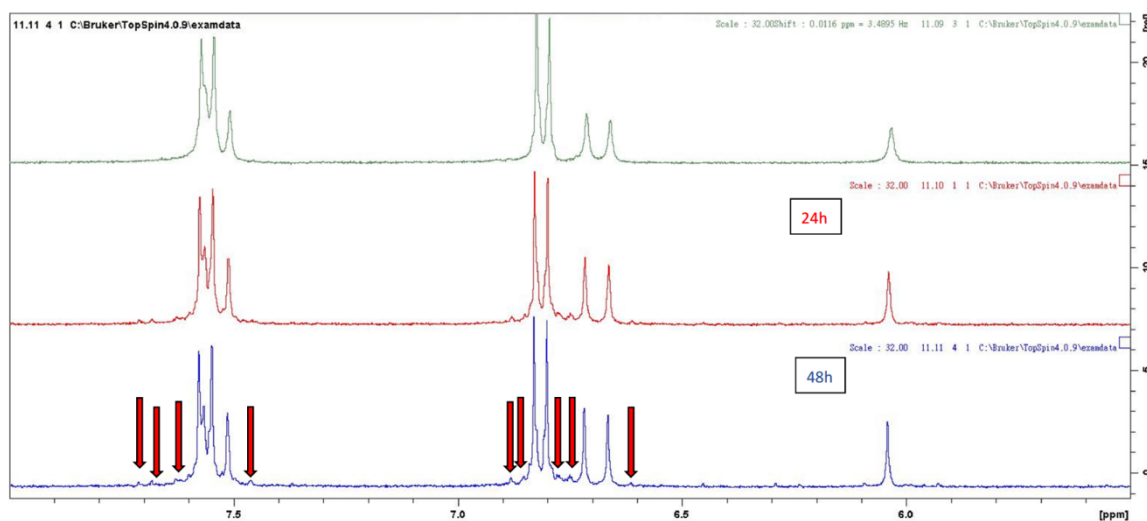

Figure S37. The NMR spectra of degraded compound 4 after storage at room temperature in the dark for 48 h. Arrows indicate the newly formed peaks.
